1  
2  
3  
4  
5  
6  
7  
8  
9  
10  
11  
12  
13  
14  
15  
16  
17  
18  
19  
20  
21  
22  
23  
24  
25  
26  
27  
28  
29  
30  
31  
32  
33  
34  
35  
36  
37

## Longitudinal protection following natural SARS-CoV-2 infection and early vaccine responses: insights from a cohort of community based dental health care professionals

Adrian M. Shields<sup>1</sup>, Sian E. Faustini<sup>1</sup>, Caroline A. Kristunas<sup>2</sup>, Alex M. Cook<sup>3</sup>, Claire Backhouse<sup>1</sup>, Lynsey Dunbar<sup>1</sup>, Daniel Ebanks<sup>1</sup>, Beena Emmanuel<sup>1</sup>, Eddie Crouch<sup>4</sup>, Annika Kroeger<sup>5,6</sup>, Josefine Hirschfeld<sup>5,7</sup>, Praveen Sharma<sup>5,7</sup>, Razza Jaffery<sup>5</sup>, Sylwia Nowak<sup>5</sup>, Samantha Gee<sup>5</sup>, Mark T. Drayson<sup>1</sup>, Alex G. Richter<sup>1</sup>, Thomas Dietrich<sup>5,6</sup>, Iain C. Chapple<sup>5,7</sup>

1. Clinical Immunology Service, Institute for Immunology and Immunotherapy, University of Birmingham, Birmingham, UK
2. Institute of Clinical Sciences, University of Birmingham, Birmingham, UK
3. The Binding Site Group Ltd, 8 Calthorpe Road, Birmingham, B15 1QT, UK.
4. Birmingham Local Dental Committee
5. Birmingham Community Healthcare Trust, Birmingham, UK
6. Department of Oral Surgery, The School of Dentistry, University of Birmingham, Birmingham, UK.
7. Periodontal Research Group, University of Birmingham.

Key words: Dentistry, SARS-CoV-2. COVID-19, vaccination, antibodies

Word count: 2,368

Number of figures: 1

Number of tables: 1

### Correspondence to:

|                      |   |                                                                        |
|----------------------|---|------------------------------------------------------------------------|
| Prof Iain Chapple    | - | <a href="mailto:i.i.c.chapple@bham.ac.uk">i.i.c.chapple@bham.ac.uk</a> |
| Prof Thomas Dietrich | - | <a href="mailto:t.dietrich@bham.ac.uk">t.dietrich@bham.ac.uk</a>       |
| Prof Alex Richter    | - | <a href="mailto:a.g.richter@bham.ac.uk">a.g.richter@bham.ac.uk</a>     |

38

39 **Abbreviations**

40

|            |                                                         |
|------------|---------------------------------------------------------|
|            |                                                         |
| AGP        | Aerosol generating procedures                           |
| COVID-19   | Coronavirus disease 2019                                |
| DCP        | Dental care professionals                               |
| GDP        | General dental practitioners                            |
| IRM        | International reference material                        |
| NIBSC      | National Institute for Biological Standards and Control |
| PCR        | Polymerase chain reaction                               |
| SARS-CoV-2 | Severe acute respiratory syndrome coronavirus 2         |
| WHO        | World Health Organization                               |

41

42

43

44

45

46

47 **Abstract**

48

49 **Background**

50 The threshold of protection for anti-SARS-CoV-2 spike glycoprotein antibodies and their longevity are not  
51 known. Interpretation of serological results in with respect to international reference material can inform  
52 this essential question.

53

54 **Methods**

55 1,507 West Midlands dental care professionals were recruited into this study in June 2020. Baseline  
56 seroprevalence of antibodies directed against the SARS-CoV-2 spike glycoprotein was determined and the  
57 cohort was followed longitudinally for 6 months until January/February 2021 through the second wave of  
58 the COVID-19 pandemic in the United Kingdom, and commencement of vaccination.

59

60 **Results**

61 Baseline seroprevalence was 16.3% in this cohort, compared to estimates in the general population of  
62 between 6-7%. Seropositivity was retained in over 70% of participants at 3 and 6-month follow up and  
63 conferred a 74% reduced risk of infection. During follow-up, no PCR-proven infections occurred in  
64 individuals with a baseline anti-SARS-CoV-2 IgG level greater than 147.6 IU/ml with respect to the World  
65 Health Organization international standard 20-136. Post-vaccination, antibody responses were more rapid  
66 and of higher magnitude in individuals with who were seropositive at baseline.

67

68 **Conclusion**

69 Natural infection leads to a serological response that remains detectable in over 70% of individuals 6  
70 months after initial sampling and 9 months from the peak of the first wave of the pandemic. This response  
71 is associated with protection from future infection. Even if serological responses wane, a single dose of the  
72 Pfizer-BioNTech vaccine is associated with an antibody response indicative of immunological memory.

73

74 **Funding**

75 The Association of Clinical Biochemistry and Laboratory Medicine and The Institute for Global Innovation  
76 (IGI) of the University of Birmingham.

77

## 78 **Introduction**

79

80 Seroepidemiological studies of healthcare workers define occupational risk of exposure to the SARS-  
81 CoV-2 virus [1-3] and seropositivity is associated with protection from subsequent infection in high-  
82 exposure cohorts [4, 5]. Such studies have guided public health planning, the design of healthcare  
83 services, and associated infection prevention protocols to mitigate risk and maintain essential care  
84 services during the pandemic. However, an absolute level of antibodies that confers protection for a  
85 given period of time remains unknown.

86 Dental care professionals (DCPs) represent a group of healthcare professionals thought to be at high-  
87 risk of exposure to SARS-CoV-2 because they routinely operate within patients' aerodigestive tract and  
88 undertake aerosol generating procedures (AGPs). The risks of occupational exposure to and infection  
89 with SARS-CoV-2 in dental teams remains unclear despite studies evaluating aerosol generation and  
90 viral recovery in relevant bodily fluids [6, 7]. Many dental practices across the world closed in March  
91 2020 and, in the United Kingdom, did not re-open until June/July 2020, when level 3 personal protective  
92 equipment (PPE) was in sufficient supply to enable resumption of AGPs for those in need of urgent  
93 dental care. The impact of this policy on patients remains unclear.

94 In June 2020, we recruited a cohort of 1,507 community and hospital based DCPs from the West  
95 Midlands region of the United Kingdom, following the first wave of the COVID-19 pandemic. The  
96 longitudinal follow-up of this cohort through the second wave of the COVID-19 pandemic and following  
97 the start of widespread vaccination of healthcare workers, afforded a unique opportunity to study  
98 occupational risk factors in DCPs, the durability of serological responses and to compare the early  
99 kinetics of serological responses following a single dose of the Pfizer-BioNTech vaccine based on prior  
100 exposure to the virus. Furthermore, using World Health Organization (WHO) and National Institute for  
101 Biological Standards and Control (NIBSC) international reference material, we were able to define an  
102 anti-SARS-CoV-2 spike glycoprotein antibody concentration arising following natural infection  
103 associated with protection from reinfection for 6 months.

104

105

106

107

108

109

110

111

112

## 113 **Methods**

114

### 115 Study recruitment

116 Registered general dental practitioners (GDPs) in the West Midlands area, were invited by email to  
117 participate in a research study on SARS-CoV-2 antibody status in May 2020. GDPs were encouraged to  
118 disseminate this invitation to their wider dental teams. A total of 1,716 individuals registered their interest,  
119 of which 1,535 attended the first study visit and provided informed written consent. Twenty-three  
120 individuals were excluded when they were found to not work in dentistry. 1,507 participants volunteered a  
121 venous blood sample that was suitable for serological analysis at their first study appointment. Study  
122 participants also provided occupational and ethnodemographic data. The index of multiple deprivation in  
123 participants' home postcode were sourced from 2019 UK Ministry of Housing, Communities and Local  
124 Government statistics [8]. Study data were collected and managed using REDCap electronic data capture  
125 tools hosted at the University of Birmingham [9]. Individuals who were seropositive at baseline were  
126 recalled three months later (September 2020) to study the persistence of their antibody response. All  
127 participants were recalled six months after providing their baseline sample (January 2021). At the time of  
128 manuscript preparation, 873 participants had volunteered a repeat blood sample suitable for serological  
129 analysis.

130

### 131 Serological analysis

132 Serological analysis was performed using a commercially available, CE marked, IgGAM ELISA that  
133 measures the total antibody response (IgG, IgA and IgM simultaneously) against the spike glycoprotein  
134 (Product code: MK654, The Binding Site (TBS), Birmingham). Detailed descriptions of this assay including  
135 its construction, validation and verification have been published previously [10, 11]. The assay is optimized  
136 for seroepidemiological studies and demonstrates 98.3% (95% CI: 96.4-99.4%) specificity and 98.6%  
137 sensitivity (95% CI: 92.6-100%) in detecting a serological response to the SARS-CoV-2 spike glycoprotein  
138 following PCR-positive, non-hospitalised, mild-to-moderate COVID-19. Internal quality control material  
139 demonstrates an inter-assay coefficient of variance of 7.2% at the cutoff. Samples are run at a standard  
140 dilution of 1/40. To assess the response of individual immunoglobulin isotypes, the above protocol was  
141 modified to employ polyclonal sheep-anti-human HRP-conjugated polyclonal antibodies against IgG  
142 (1:16,000) and IgA (1:2000) as secondary antibodies. For these assays, a cutoff ratio of 1.0 relative to the  
143 existing TBS cutoff calibrators was determined by plotting the pre-2019 negatives (n=90) in a frequency  
144 histogram chart. Once the ratio cutoff was determined from the pre-2019 negatives, a cut-off multiplier of  
145 1.0 and 0.71 was established for IgG and IgA respectively.

146

### 147 NIBSC and WHO standards

148 In late 2020, the National Institute for Biological Standards and Control (NIBSC) developed international  
149 reference material (IRM) for the purposes of traceability and calibration of SARS-CoV-2 serological tests.  
150 These include NIBSC 20/136, the first World Health Organization International Standard for anti-SARS-  
151 CoV-2 immunoglobulin [12] and NIBSC 20/162. Serial dilutions of these IRM were run in triplicate on the  
152 SARS-CoV-2 IgG assay described above. A receiver operator characteristics curve was constructed using  
153 baseline anti-SARS-CoV-2 IgG antibody levels and binary seropositivity/seronegativity at 6 months as the  
154 outcome variable. In reference to the NIBSC standard, the minimum level of anti-SARS-CoV-2 IgG  
155 antibodies in baseline samples associated with protection for 6 months was inferred, based on the original  
156 dilution of samples.

157

158

159

160 Statistical analysis

161 Data was analysed in Stata 16 (StataCorp. 2019. Stata Statistical Software: Release 16. College Station,  
162 TX: StataCorp LLC.) and Graph Pad Prism 9.0 (GraphPad Prism Software, San Diego, California). With  
163 respect to demographic data, categorical characteristics were compared using a Chi-Squared test and  
164 continuous characteristics compared using the Wilcoxon Rank Sum Test. The distribution of IgG ratios at  
165 different time points were compared using the Kolmogorov-Smirnov Test with a false discovery rate  
166 approach set at 1% (Benjamini, Krieger and Yekutieli method).

167

## 168 Results

169

170 Following the first wave of the COVID-19 pandemic, the baseline seroprevalence of anti-SARS-CoV-2 spike  
171 glycoprotein antibodies in this cohort of DCPs was 16.3% (n=246/1507) (**Table 1**). Ethnicity was a  
172 significant risk factor for seropositivity at baseline, with higher seroprevalence observed in individuals of  
173 Black ethnicity (35.0%), compared to those of Asian (18.8%) and white ethnicity (14.3%) (p=0.018). There  
174 were no differences in seroprevalence between different DCPs; receptionists, who do not have direct  
175 patient contact, had the lowest baseline seroprevalence (6.3%), a finding concordant with estimates of  
176 seroprevalence in the general population of the West Midlands at the time of baseline sampling [13].  
177 Current smoking was associated with a lower seroprevalence compared to never-smokers or ex-smokers  
178 (7.6% vs 16.4% vs 17.6%, p=0.007). Deprivation was associated with a higher seroprevalence: the median  
179 index of multiple deprivation rank was 8238 (IQR: 3240, 14408) for seropositive individuals compared to  
180 12081 (IQR: 3858, 21795) for those that were seronegative (p=0.004).

181

182 The cohort was followed longitudinally: individuals who were seropositive at baseline were re-bled at 3  
183 months to study the durability of serological responses (**Figure 1A**). 73% of individuals continued to have a  
184 detectable serological response against the spike glycoprotein at three months and, in a subgroup of 79  
185 individuals who were seropositive at baseline and who reattended prior to their vaccination at 6 months, a  
186 serological response remained detectable in 72%. Individual IgG and IgA responses were also measured in  
187 those who were seropositive. Anti-spike glycoprotein IgG and IgA response were detectable in 42% and  
188 16% of individuals at baseline, reducing to 37% and 9% at 3 months respectively. The discordance between  
189 seropositivity defined by the detection of the total antibody response (IgGAM) against the SARS-CoV-2  
190 spike glycoprotein, compared to the IgG isotype, arises from the optimization of the assay for  
191 seroepidemiological studies (see Methods).

192

193 61.4% (n=926/1507) of the cohort returned questionnaires regarding SARS-CoV-2 infections at 6 months  
194 and 59.2% (n=873/1507) were re-bled. In this cohort, 77 PCR-positive SARS-CoV-2 infections were reported  
195 by study participants, representing an overall infection risk of 8.3%. The risk of infection was 9.6% in  
196 participants who were seronegative at baseline, compared to 2.8% in individuals who were seropositive  
197 (p=0.001). As seropositivity at baseline in June 2020 could only be accounted for by SARS-CoV-2 infection,  
198 these data suggest that the emergence of antibodies following natural infection with SARS-CoV-2 is  
199 associated with a 74% risk reduction for future infection (Risk Ratio 0.26, 95% CI 0.11, 0.63, adjusted for  
200 age, sex, ethnicity and smoking).

201

202 To further investigate, the phenomenon of re-infection in participants who were seropositive at baseline  
203 using the IgGAM assay, participants' individual IgG and IgA responses against the SARS-CoV-2 spike  
204 glycoprotein reviewed. Reinfections only occurred in the absence of a specific, detectable anti-spike  
205 glycoprotein IgG response. Thus, to determine an absolute level of SARS-CoV-2 antibodies associated  
206 with ongoing seropositivity at 6 months, we reviewed the baseline anti-spike glycoprotein IgG levels of the  
207 79 participants who had been re-sampled prior to vaccination at 6 months (**Figure 1B**). An IgG ratio greater  
208 than 2.97 conferred a likelihood ratio of 2.43 of IgG seropositivity at 6 months (sensitivity 69.7% CI 56.7-  
209 80.1%, specificity 71.4% CI 35.9-94.2%); no participant with a baseline IgG ratio greater than 3.36 was IgG  
210 seronegative at 6 months (sensitivity 60.7%, CI 47.6-72.4%, specificity 57.0-100.0%). In reference to the  
211 first WHO standard for SARS-CoV-2 immunoglobulin (NIBSC 20/136) and the original dilution of the

212 baseline samples, we estimate that the minimum level of anti-SARS-CoV-2 spike glycoprotein IgG  
213 antibodies necessary to confer 6 months protection from infection is 147.6 IU/ml (**Figure 1C**). Studies using  
214 the NIBSC standard 20/162, generated a similar estimate of 195.2 U/ml.

215

216 873 participants were re-bled in January 2021 following 6 months of follow-up. Through natural infection  
217 and vaccination, the overall seroprevalence had risen to 49.1% (n=429/873). In individuals who donated  
218 serum prior to vaccination and who were seronegative at baseline (n=308), 36 PCR-positive infections  
219 occurred and a further 24 asymptomatic seroconversion events had occurred, suggesting the infection risk  
220 during the 6-month follow-up period may be as high as 19.4% (n=60/308). 51.5% (n=450/873) had received  
221 a single dose of a SARS-CoV-2 vaccine (Oxford/AstraZeneca, n =17; Pfizer-BioNTech, n= 429; Unknown,  
222 n=4). The serological responses of individuals receiving a single dose of the Pfizer-BioNTech SARS-CoV-2  
223 were analysed based on prior exposure to the virus - defined by either positive baseline serology, or PCR-  
224 proven infection during the follow up period (**Figure 1D**). Vaccination on the background of prior exposure  
225 to the virus was associated with a more rapid and quantitatively greater total antibody response against  
226 the SARS-CoV-2 spike glycoprotein, consistent with the boosting of immunological memory. In naive  
227 participants, greater than 95% seroprevalence was achieved 12 days after vaccination.

228

229

230

231

232

233



234

## 235 Discussion

236

237 Consistent with other studies, we demonstrate that natural infection with SARS-CoV-2 is generally  
238 associated with robust and durable serological responses [14, 15]. The percentage of individuals who lose  
239 detectable serological responses after 3 months (30%) is higher than that reported in other studies. This is  
240 most likely due to the sensitivity of the screening assay that measures the total antibody against the spike  
241 glycoprotein [10]. This approach identifies individuals who are exposed to the virus with high sensitivity  
242 but some individual appear to mount modest serological responses that are not associated with durable  
243 immunity. Nevertheless, in this community based cohort, we corroborate the findings of Lumley et al [5]  
244 and Hanrath et al [4] in demonstrating that seropositivity at baseline is associated with protection from  
245 infection with SARS-CoV-2. We observed that symptomatic reinfections only occurred in individuals who  
246 lacked a robust IgG response, and thus, by relating initial anti-spike glycoprotein IgG levels to the WHO  
247 first international reference material for anti-SARS-CoV-2 immunoglobulin (NIBSC 20/136), define a  
248 putative antibody level of 147.6 IU/ml that affords a minimum of 6 months protection from reinfection.  
249 Clinically, real-world data that relate protection from infection with antibody binding in an *in vitro* assay is  
250 invaluable. Further longitudinal studies in cohorts of individuals following natural infection and vaccination  
251 will be necessary to replicate these findings with using assays that employ alternative target SARS-CoV-2  
252 antigens, such as the receptor binding domain, or nucleocapsid.

253

254 Vaccination is the most cost-effective and efficacious public health intervention of modern times. In the  
255 United Kingdom, the rapid deployment of the Pfizer-BioNTech SARS-CoV-2 vaccination coincided with a  
256 planned 6-month follow up of this cohort, affording a unique opportunity to investigate the early  
257 serological response to vaccination. Following a single dose of vaccine in naïve recipients, SARS-CoV-2  
258 antibodies were detectable in over 95% of individuals 12 days after vaccination and persisted beyond 25  
259 days post vaccination. In keeping with other contemporaneous studies, we also demonstrate that prior  
260 viral infection leads to a more rapid and robust antibody response, consistent secondary immunological  
261 responses [16, 17]. The nature and duration of immunity in these cohorts will be critical to understand as  
262 the COVID-19 pandemic progresses, particularly with respect to the efficacy of vaccination strategies  
263 (single-dose, multiple-doses, vaccine combinations) and in relation to novel viral variants of concern.

264

265 Finally, in this community-based cohort of over 1500 individuals, we demonstrate that DCP have a  
266 significant occupational risk of exposure to the SARS-CoV-2 virus. The overall baseline seroprevalence in  
267 this study of 16.3% exceeds that of the general population in the West Midlands region (6-7%) in June 2020  
268 [13]. The observation that the seroprevalence amongst dental practice receptionists, who have no direct  
269 patient contact, was comparable to the general population, supports the hypothesis that occupational risk  
270 arose from close exposure to patients. Seroprevalence across the West Midlands region increased by  
271 12.3% between June 2020 and January 2021 [18]; the risk of PCR-proven infection in seronegative DCPs in  
272 our study during this time was 11.7%. Further studies are necessary to comprehensively understand  
273 whether these comparative statistics represent a lowering of exposure rates of DCPs to background  
274 population levels following reopening of general dental practices and the additional precautions taken to  
275 ensure practices became COVID-19 secure.

276

277

278

279

280 **Figure Legends**

281

282 **Figure 1: A** Total anti-SARS-CoV-2 spike glycoprotein antibodies (Total GAM) and IgG and IgA anti SARS-  
283 CoV-2 spike glycoprotein antibodies measured at baseline, 3 months and 6 month follow up. At 6 months,  
284 only individuals who had not been vaccinated are shown. Data are provided as a ratio of the level of  
285 antibody compared to the cutoff calibrator set at 1.0. Percentage of individual above the assay cutoff at  
286 each time point is also provided above each column. Median and 95% confidence intervals are shown. **B**  
287 Receiver operator characteristic curve describing the relationship between baseline anti SARS-CoV-2 spike  
288 glycoprotein IgG ratio and binary IgG seropositivity at 6-month follow up. AUC = 0.80,  $p=0.01$ . **C**  
289 International reference materials NIBSC 20-136 (WHO) and 20-162 was run in triplicate serial dilutions and  
290 the IgG ratio determined. The minimum IgG ratio associated with guaranteed seropositivity 6 months  
291 from baseline is shown by the red and blue dotted lines. **D** Kinetics of total antibody response in 423  
292 individuals following a single dose of the Pfizer-BioNTech vaccine. \* demonstrate a significant difference  
293 ( $p<0.05$ ) between the distributions of IgGAM ratios at each timepoint following vaccination between  
294 individuals who were seropositives and seronegative at baseline as determined by Kolmogorov-Smirnov  
295 test. Percentage of individual above the assay cutoff at each time point is also provided.

296

297

298

299 **References**

- 300 1. Eyre, D.W., et al., Differential occupational risks to healthcare workers from SARS-CoV-2 observed  
301 during a prospective observational study. *Elife*, 2020. **9**.
- 302 2. Houlihan, C.F., et al., Pandemic peak SARS-CoV-2 infection and seroconversion rates in London  
303 frontline health-care workers. *Lancet*, 2020. **396**(10246): p. e6-e7.
- 304 3. Shields, A., et al., SARS-CoV-2 seroprevalence and asymptomatic viral carriage in healthcare workers: a  
305 cross-sectional study. *Thorax*, 2020.
- 306 4. Hanrath, A.T., B.A.I. Payne, and C.J.A. Duncan, Prior SARS-CoV-2 infection is associated with protection  
307 against symptomatic reinfection. *J Infect*, 2020.
- 308 5. Lumley, S.F., et al., Antibody Status and Incidence of SARS-CoV-2 Infection in Health Care Workers. *N*  
309 *Engl J Med*, 2020.
- 310 6. Chau, N.V.V., et al., The natural history and transmission potential of asymptomatic SARS-CoV-2  
311 infection. *Clin Infect Dis*, 2020. **71**(10): p. 2679-87.
- 312 7. Allison, J.R., et al., Evaluating aerosol and splatter following dental procedures: Addressing new  
313 challenges for oral health care and rehabilitation. *J Oral Rehabil*, 2021. **48**(1): p. 61-72.
- 314 8. Ministry of Housing, Communities, and Local Government. English indices of deprivation 2019. 2019.
- 315 9. Harris, P.A., et al., Research electronic data capture (REDCap)--a metadata-driven methodology and  
316 workflow process for providing translational research informatics support. *J Biomed Inform*, 2009. **42**(2): p.  
317 377-81.
- 318 10. Cook, A.M., et al., Validation of a combined ELISA to detect IgG, IgA and IgM antibody responses to  
319 SARS-CoV-2 in mild or moderate non-hospitalised patients. *medRxiv*, 2020: p. 2020.11.30.20229732.
- 320 11. Faustini, S.E., et al., Detection of antibodies to the SARS-CoV-2 spike glycoprotein in both serum and  
321 saliva enhances detection of infection. *medRxiv*, 2020: p. 2020.06.16.20133025.
- 322 12. Mattiuzzo, G, et al, *Establishment of the WHO International Standard and Reference Panel for anti-*  
323 *SARS-CoV-2 antibody.*, W.H. Organization, Editor. 2020, World Health Organization. p. 60.
- 324 13. Public Health England, *Sero-surveillance of COVID-19*, P.H. England, Editor. 2020.
- 325 14. Wajnberg, A., et al., Robust neutralizing antibodies to SARS-CoV-2 infection persist for months.  
326 *Science*, 2020. **370**(6521): p. 1227-1230.
- 327 15. Dan, J.M., et al., Immunological memory to SARS-CoV-2 assessed for up to 8 months after infection.  
328 *Science*, 2021. **371**(6529).
- 329 16. Krammer, F., K. Srivastava, and V. Simon, Robust spike antibody responses and increased  
330 reactivity in seropositive individuals after a single dose of SARS-CoV-2 mRNA vaccine. *medRxiv*,  
331 2021: p. 2021.01.29.21250653.
- 332 17. Stamatatos, L., et al., Antibodies elicited by SARS-CoV-2 infection and boosted by vaccination  
333 neutralize an emerging variant and SARS-CoV-1. *medRxiv*, 2021: p. 2021.02.05.21251182.
- 334 18. Office of National Statistics, *Coronavirus (COVID-19) Infection Survey, antibody data for the UK: 3*  
335 *February 2021*, O.o.N. Statistics, Editor. 2021
- 336

337

338 **Acknowledgements**

339 The authors are grateful to the staff of the University of Birmingham Clinical Immunology Service for  
340 facilitating laboratory studies. The authors are also grateful to Joanne Crumpler, Jacqui Rees, Joanne  
341 Whitehouse, Joanna Rooney, Amneet Sidhu, Amanda Stokes, Harpreet Dhani, Marie Jones, Kate Ward,  
342 Erika Malone, Jessica Chapple and Yvonne Simaloi for their help supporting this study. Finally, the authors  
343 are indebted to the DCPs in the West Midlands region who volunteered to participate in this study.

344

345 **Ethical approval**

346 The study was approved by the London - Camden and Kings Cross Research Ethics Committee (reference  
347 20/HRA/1817). All participants provided written informed consent prior to enrolment in the study

348

349 **Role of the funding source**

350 The authors are grateful for funding from the Association of Clinical Biochemistry and Laboratory  
351 Medicine for supporting this work.

352

353 **Competing interests**

354 MTD reports personal fees from Abingdon Health, outside the submitted work. AMC is an employee of the  
355 Binding Site Group. All other authors declare no competing interests.

356

357 **Availability of data and materials**

358 Data are available for a period of 24 months from publication upon reasonable request. Proposals should  
359 be directed to the corresponding authors.

360

## 361 Bibliography

362

363 1. Eyre, D.W., et al., Differential occupational risks to healthcare workers from SARS-CoV-2 observed  
364 during a prospective observational study. *Elife*, 2020. **9**.

365 2. Houlihan, C.F., et al., Pandemic peak SARS-CoV-2 infection and seroconversion rates in London  
366 frontline health-care workers. *Lancet*, 2020. **396**(10246): p. e6-e7.

367 3. Shields, A., et al., SARS-CoV-2 seroprevalence and asymptomatic viral carriage in healthcare  
368 workers: a cross-sectional study. *Thorax*, 2020.

369 4. Hanrath, A.T., B.A.I. Payne, and C.J.A. Duncan, Prior SARS-CoV-2 infection is associated with  
370 protection against symptomatic reinfection. *J Infect*, 2020.

371 5. Lumley, S.F., et al., Antibody Status and Incidence of SARS-CoV-2 Infection in Health Care  
372 Workers. *N Engl J Med*, 2020.

373 6. Chau, N.V.V., et al., The natural history and transmission potential of asymptomatic SARS-CoV-2  
374 infection. *Clin Infect Dis*, 2020. **71**(10): p. 2679-87.

375 7. Allison, J.R., et al., Evaluating aerosol and splatter following dental procedures: Addressing new  
376 challenges for oral health care and rehabilitation. *J Oral Rehabil*, 2021. **48**(1): p. 61-72.

377 8. Ministry of Housing, C.a.L.G., English indices of deprivation 2019. 2019.

378 9. Harris, P.A., et al., Research electronic data capture (REDCap)--a metadata-driven methodology  
379 and workflow process for providing translational research informatics support. *J Biomed Inform*, 2009.  
380 **42**(2): p. 377-81.

381 10. Cook, A.M., et al., Validation of a combined ELISA to detect IgG, IgA and IgM antibody responses  
382 to SARS-CoV-2 in mild or moderate non-hospitalised patients. *medRxiv*, 2020: p. 2020.11.30.20229732.

383 11. Faustini, S.E., et al., Detection of antibodies to the SARS-CoV-2 spike glycoprotein in both serum  
384 and saliva enhances detection of infection. *medRxiv*, 2020: p. 2020.06.16.20133025.

385 12. Mattiuzzo, G., Bentley EM, Hassall M, Routley S, Richardson S, Bernasconi V, Kristiansen P,  
386 Harvala H, Roberts D, Semple MG, Turtle LCW, Openshaw PJM, Baillie K, ISARIC4C Investigators, Nissen-  
387 Meyer L, Branstaeter AB, Baxendale H, Atkinson E, Rigsby P, Padley D, Almond, N, Rose NJ, Page M,  
388 *Establishment of the WHO International Standard and Reference Panel for anti-SARS-CoV-2 antibody.*, W.H.  
389 Organization, Editor. 2020, World Health Organization. p. 60.

390 13. PHE, *Sero-surveillance of COVID-19*, P.H. England, Editor. 2020.

391 14. Wajnberg, A., et al., Robust neutralizing antibodies to SARS-CoV-2 infection persist for months.  
392 *Science*, 2020. **370**(6521): p. 1227-1230.

393 15. Dan, J.M., et al., Immunological memory to SARS-CoV-2 assessed for up to 8 months after  
394 infection. *Science*, 2021. **371**(6529).

395 16. Krammer, F., K. Srivastava, and V. Simon, Robust spike antibody responses and increased  
396 reactogenicity in seropositive individuals after a single dose of SARS-CoV-2 mRNA vaccine. *medRxiv*,  
397 2021: p. 2021.01.29.21250653.

398 17. Stamatatos, L., et al., Antibodies elicited by SARS-CoV-2 infection and boosted by vaccination  
399 neutralize an emerging variant and SARS-CoV-1. *medRxiv*, 2021: p. 2021.02.05.21251182.

400 18. Statistics, O.o.N., *Coronavirus (COVID-19) Infection Survey, antibody data for the UK: 3 February*  
401 2021, O.o.N. Statistics, Editor. 2021:

402 [https://www.ons.gov.uk/peoplepopulationandcommunity/healthandsocialcare/conditionsanddiseases/arti](https://www.ons.gov.uk/peoplepopulationandcommunity/healthandsocialcare/conditionsanddiseases/articles/coronaviruscovid19infectionsurveyantibodydatafortheuk/3february2021#collaboration)  
403 [cles/coronaviruscovid19infectionsurveyantibodydatafortheuk/3february2021#collaboration](https://www.ons.gov.uk/peoplepopulationandcommunity/healthandsocialcare/conditionsanddiseases/articles/coronaviruscovid19infectionsurveyantibodydatafortheuk/3february2021#collaboration).

A

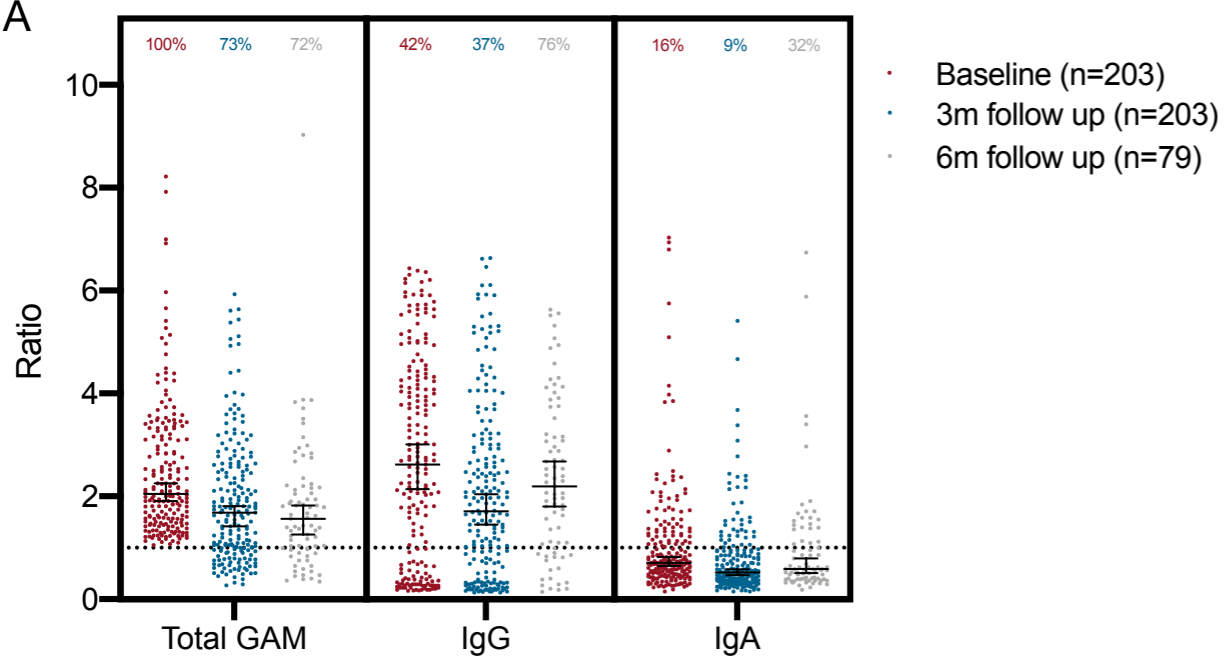

B

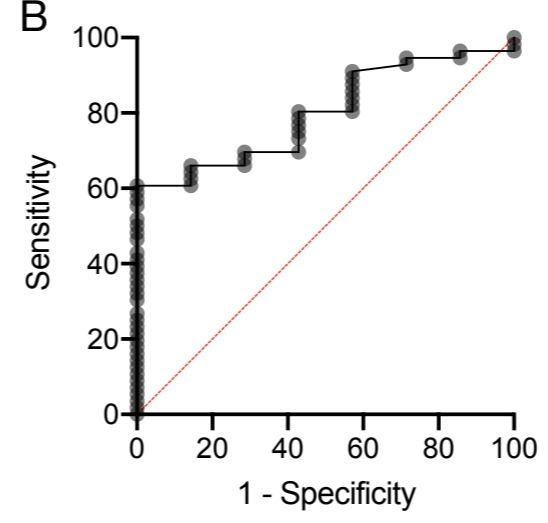

C

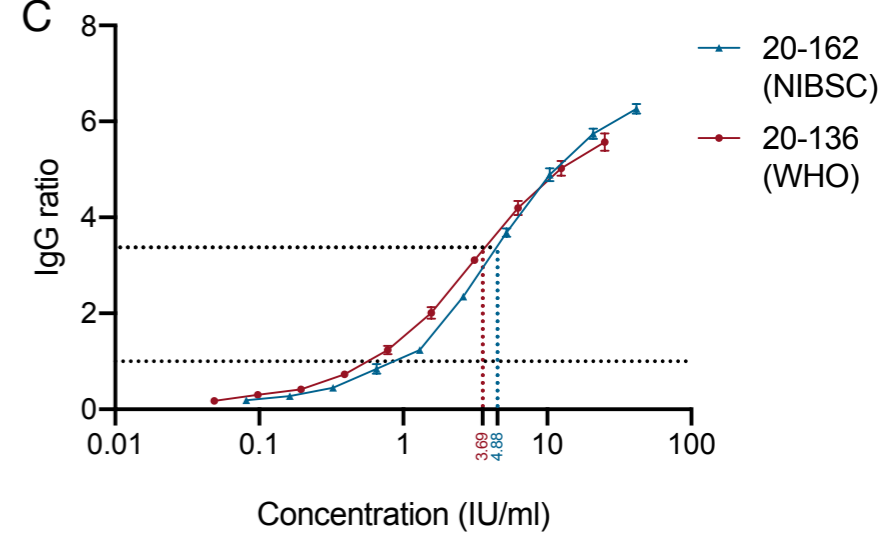

D

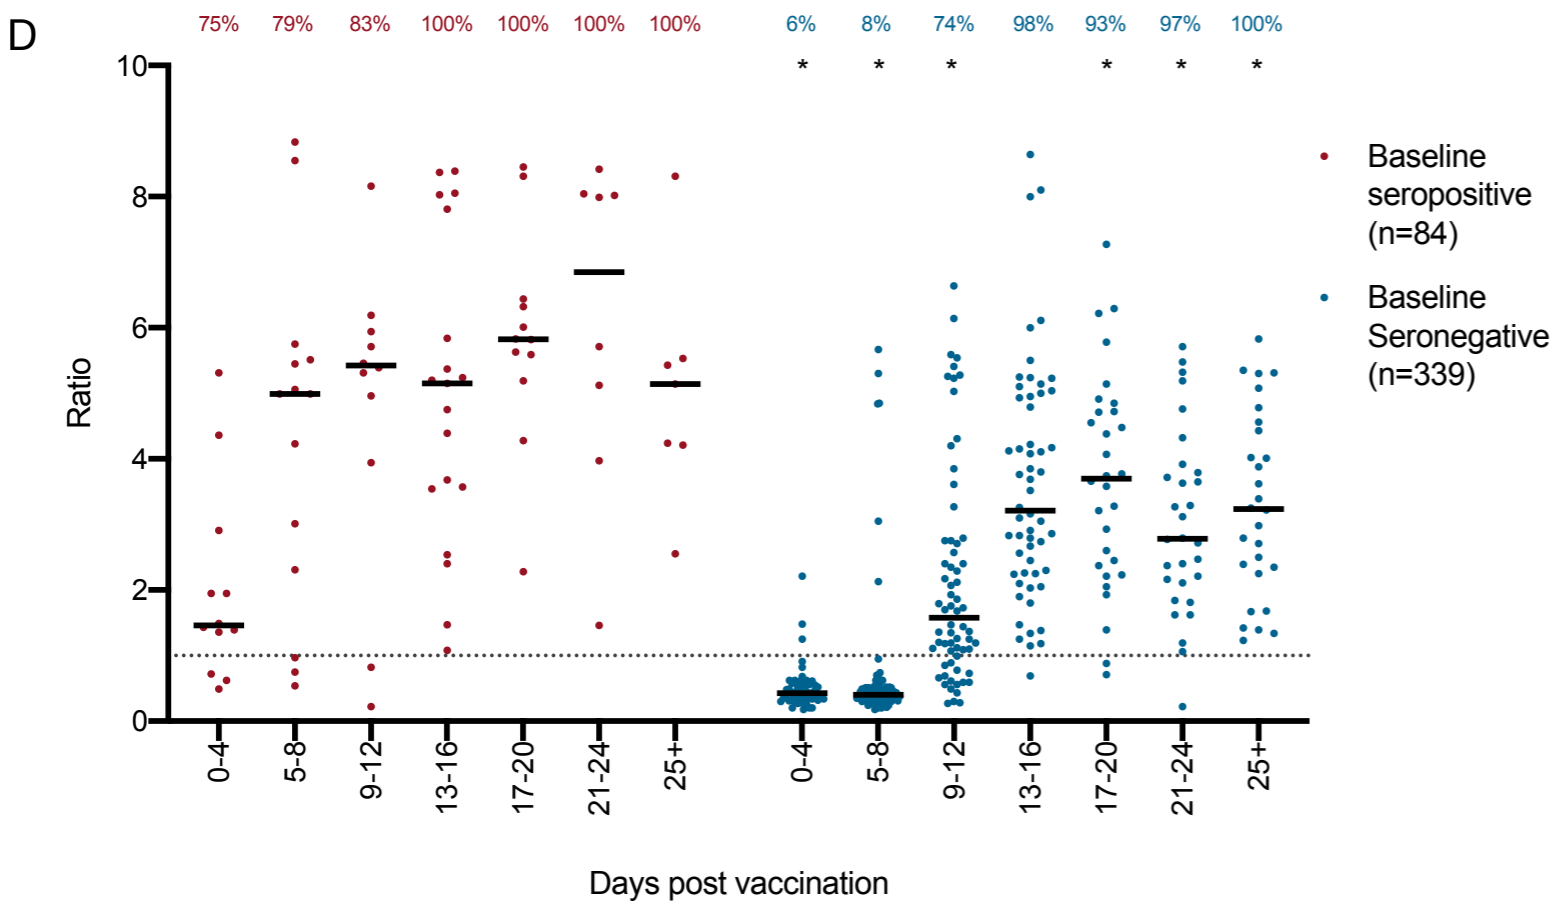

**Figure 1:** **A** Total anti-SARS-CoV-2 spike glycoprotein antibodies (Total GAM) and IgG and IgA anti SARS-CoV-2 spike glycoprotein antibodies measured at baseline, 3 months and 6 month follow up. At 6 months, only individuals who had not been vaccinated are shown. Data are provided as a ratio of the level of antibody compared to the cutoff calibrator set at 1.0. Percentage of individual above the assay cutoff at each time point is also provided above each column. Median and 95% confidence intervals are shown. **B** Receiver operator characteristic curve describing the relationship between baseline anti SARS-CoV-2 spike glycoprotein IgG ratio and binary IgG seropositivity at 6-month follow up. AUC = 0.80, p=0.01. **C** International reference materials NIBSC 20-136 (WHO) and 20-162 was run in triplicate serial dilutions and the IgG ratio determined. The minimum IgG ratio associated with guaranteed seropositivity 6 months from baseline is shown by the red and blue dotted lines. **D** Kinetics of total antibody response in 423 individuals following a single dose of the Pfizer-BioNTech vaccine. \* demonstrate a significant difference (p<0.05) between the distributions of IgGAM ratios at each timepoint following vaccination between individuals who were seropositives and seronegative at baseline as determined by Kolmogorov-Smirnov test. Percentage of individual above the assay cutoff at each time point is also provided.

**Table 1: Demographics of study population.** Number (%) are presented for categorical and binary characteristics and compared using a Chi-Squared test. Median (interquartile range (IQR)) are presented for continuous characteristics and compared using the Wilcoxon Rank Sum Test.

|                                                          | All participants<br>n (%)* | Seropositive<br>n (%)* | Seronegative<br>n (%)* | Seroprevalence<br>(%)* | P-value |
|----------------------------------------------------------|----------------------------|------------------------|------------------------|------------------------|---------|
| <b>n</b>                                                 | 1507 (100)                 | 246 (16.3)             | 1261 (83.7)            | 16.3                   |         |
| <b>Age (years) (median (IQR))</b>                        | 37 (29, 47)                | 36 (28, 46)            | 37 (29, 48)            | -                      | 0.130   |
| <b>Sex</b>                                               |                            |                        |                        |                        |         |
| Male                                                     | 371 (24.6)                 | 56 (22.8)              | 315 (25.0)             | 15.1                   | 0.461   |
| Female                                                   | 1136 (75.4)                | 190 (77.2)             | 946 (75.0)             | 16.7                   |         |
| <b>Ethnicity</b>                                         |                            |                        |                        |                        |         |
| White                                                    | 830 (55.1)                 | 119 (48.4)             | 711 (56.4)             | 14.3                   | 0.020   |
| Asian                                                    | 584 (38.8)                 | 110 (44.7)             | 474 (37.6)             | 18.8                   |         |
| Black                                                    | 20 (1.3)                   | 7 (2.9)                | 13 (1.0)               | 35.0                   |         |
| Mixed                                                    | 39 (2.6)                   | 7 (2.9)                | 32 (2.5)               | 18.0                   |         |
| Other                                                    | 34 (2.3)                   | 3 (1.2)                | 31 (2.5)               | 8.8                    |         |
| <b>Index of multiple deprivation rank (median (IQR))</b> | 11750<br>(3717, 21688)     | 8238<br>(3240,14408)   | 12081<br>(3858, 21795) | -                      |         |
| <b>Diabetic</b>                                          |                            |                        |                        |                        |         |
| Yes                                                      | 21 (1.4)                   | 4 (1.6)                | 17 (1.4)               | 19.1                   | 0.734   |
| No                                                       | 1486 (98.6)                | 242 (98.4)             | 1244 (98.6)            | 16.3                   |         |
| <b>Other medical conditions</b>                          |                            |                        |                        |                        |         |
| Yes                                                      | 354 (23.3)                 | 55 (22.4)              | 299 (23.7)             | 15.5                   | 0.647   |
| No                                                       | 1153 (76.7)                | 191 (77.6)             | 962 (76.3)             | 16.6                   |         |
| <b>Smoking</b>                                           |                            |                        |                        |                        |         |
| Never                                                    | 1100 (73.0)                | 193 (78.5)             | 907 (71.9)             | 17.6                   | 0.007   |
| Former                                                   | 250 (16.6)                 | 41 (16.7)              | 206 (16.6)             | 16.4                   |         |
| Current                                                  | 157 (10.4)                 | 12 (4.9)               | 145 (11.5)             | 7.6                    |         |
| <b>Occupation</b>                                        |                            |                        |                        |                        |         |
| Dentist                                                  | 687 (45.6)                 | 115 (46.8)             | 572 (45.4)             | 16.7                   | 0.398   |
| Dental nurse                                             | 528 (35.0)                 | 89 (36.2)              | 439 (34.8)             | 16.9                   |         |
| Dental hygienist/therapist                               | 116 (7.7)                  | 18 (7.3)               | 98 (7.7)               | 15.5                   |         |
| Receptionist                                             | 80 (5.3)                   | 5 (2.0)                | 75 (6.0)               | 6.3                    |         |
| Clinical dental technician                               | 2 (0.1)                    | 0 (0.0)                | 2 (0.2)                | 0.0                    |         |
| Practice manager                                         | 51 (3.4)                   | 11 (4.5)               | 40 (3.2)               | 21.6                   |         |
| Other dental healthcare occupation                       | 22 (1.5)                   | 5 (2.0)                | 17 (1.4)               | 22.7                   |         |
| Auxiliary staff in dental practice/hospital/clinic       | 13 (0.9)                   | 2 (0.8)                | 11 (0.9)               | 15.4                   |         |
| Other (no detail provided)                               | 8 (0.5)                    | 1 (0.4)                | 7 (0.6)                | 12.5                   |         |

\*unless otherwise stated
